# Supplementary material for: A nonclassical pathway to biomimetic strained SrSO4 crystals
Source: Royal Society of Chemistry journal article supplement (doi:10.1039/d2ce00379a), 2022-01-01
Supplement: d2ce00379a1.pdf [file d2ce00379a1.pdf]

## Supplementary Information

### Nonclassical Pathway to Biomimetic Strained $\text{SrSO}_4$ Crystals

Rina Fujimaki, Yuya Oaki, and Hiroaki Imai\*

Department of Applied Chemistry, Faculty of Science and Technology, Keio University, 3-14-1 Hiyoshi, Kohoku-ku, Yokohama 223-8522, Japan, E-mail\*: hiroaki@aplc.keio.ac.jp

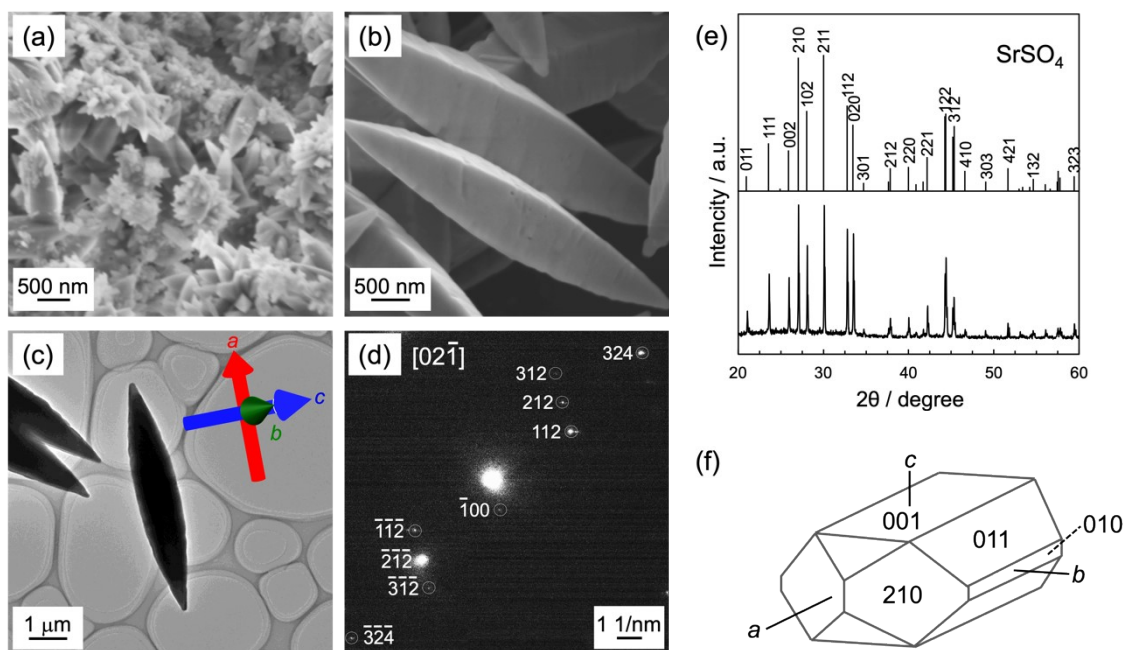

Fig. S1 SEM (a, b) and TEM (c) images and SAED (d) and XRD patterns (e) of products by mixing  $\text{Na}_2\text{SO}_4$  and  $\text{SrCl}_2$  without additives. The initial products (a) and crystals after a reaction over 15 min (b, c). ICDD#00-005-0593 for  $\text{SrSO}_4$  (orthorhombic,  $a = 0.8359$  nm,  $b = 0.5352$  nm,  $c = 0.6866$  nm). A schematic illustration of a geological  $\text{SrSO}_4$  crystal with a tabular (001) habit and common crystallographic orientation (f). We reproduced the image from an illustration in ref. #1.

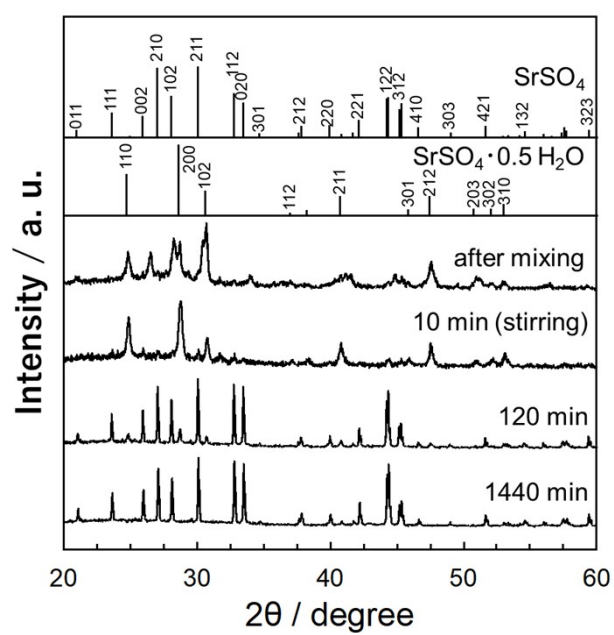

Fig. S2 XRD patterns of products by mixing  $\text{SrCl}_2$  and  $\text{Na}_2\text{SO}_4$  solutions with PAA ( $69 \text{ mmol/dm}^3$ ) with Miller indices. ICDD#00-048-0965 for  $\text{SrSO}_4 \cdot 0.5\text{H}_2\text{O}$  (hexagonal,  $a = 0.7188 \text{ nm}$ ,  $c = 0.6593 \text{ nm}$ ), ICDD#00-005-0593 for  $\text{SrSO}_4$  (orthorhombic,  $a = 0.8359 \text{ nm}$ ,  $b = 0.5352 \text{ nm}$ ,  $c = 0.6866 \text{ nm}$ ).

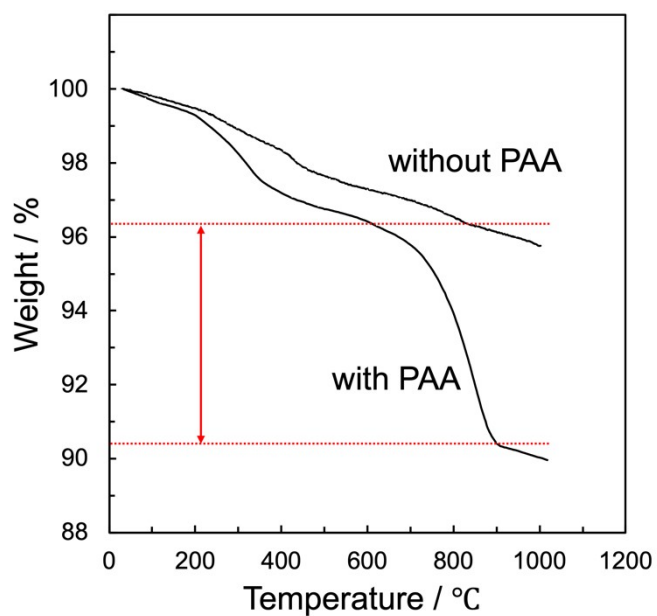

Fig. S3 TG curves of products obtained by mixing  $\text{SrCl}_2$  and  $\text{Na}_2\text{SO}_4$  solutions with ( $35 \text{ mmol/dm}^3$ ) and without PAA. A weight loss in the product without PAA is ascribed to water contained inside the crystals.

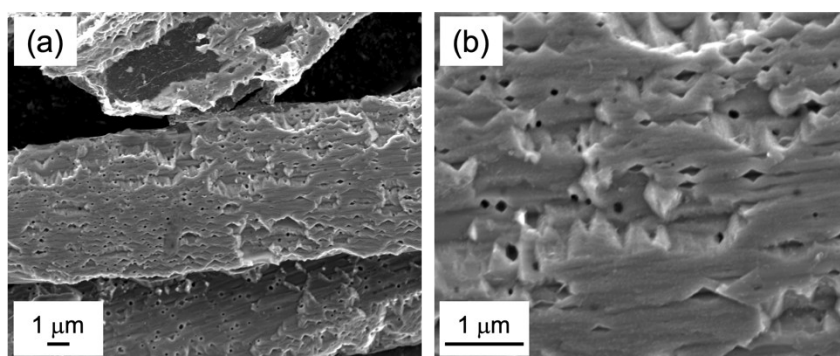

Fig. S4 SEM images (a, b) of  $\text{SrSO}_4$  spines of acantharian skeletons.

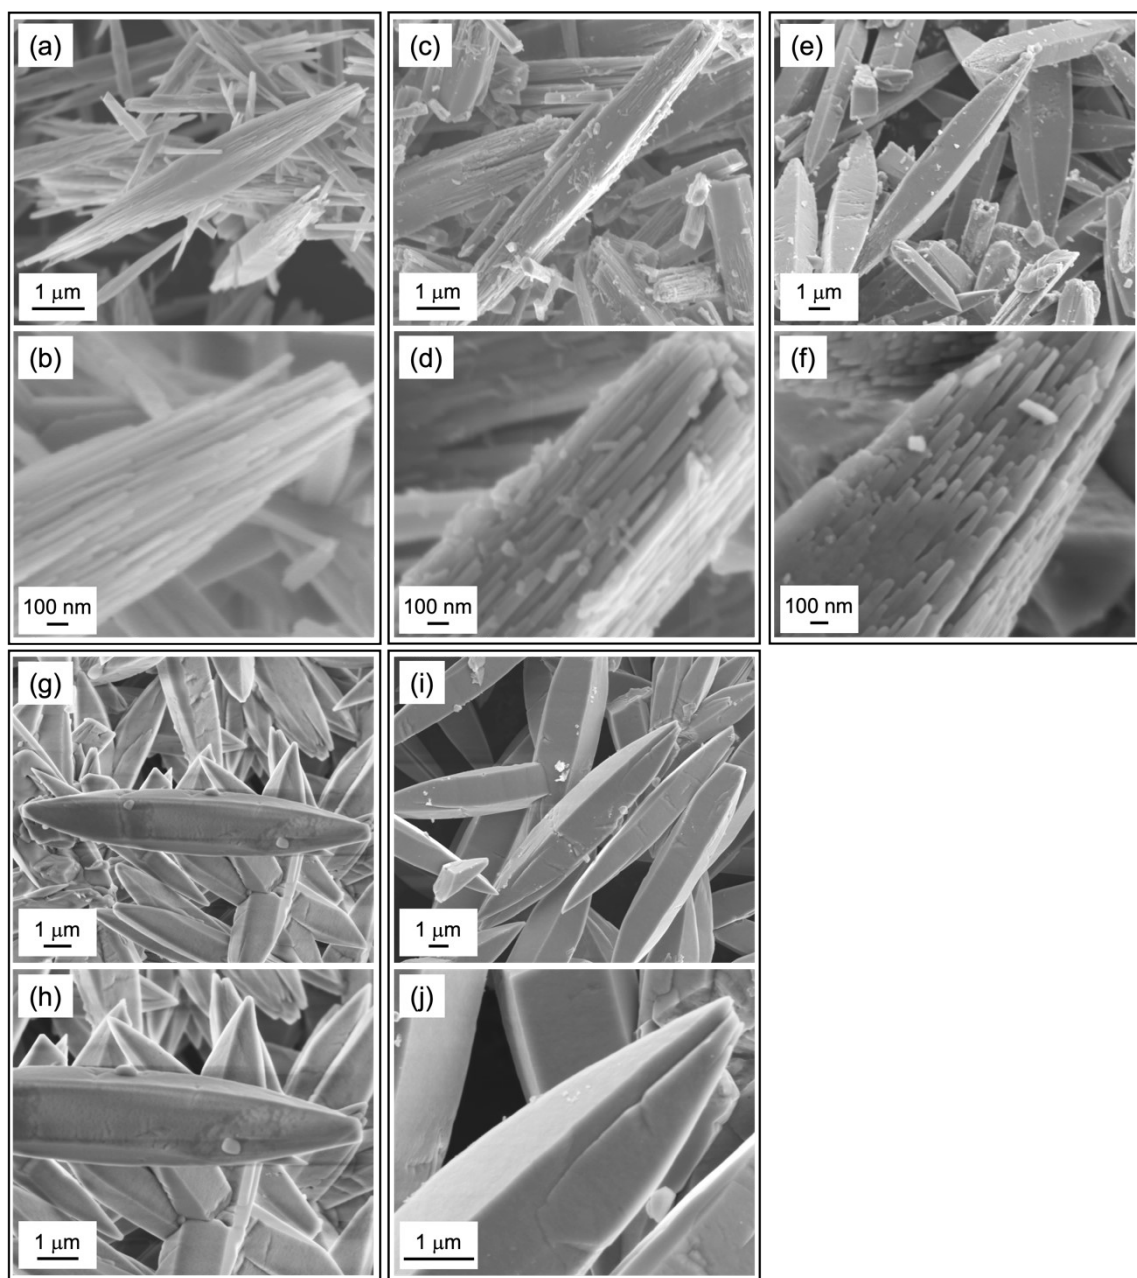

Fig. S5 SEM images of products in supersaturated solution containing various concentrations of PAA. (a, b) 17, (c, d) 35, (e, f) 69, (g, h) 104, and (i, j) 138 mmol/dm<sup>3</sup>.

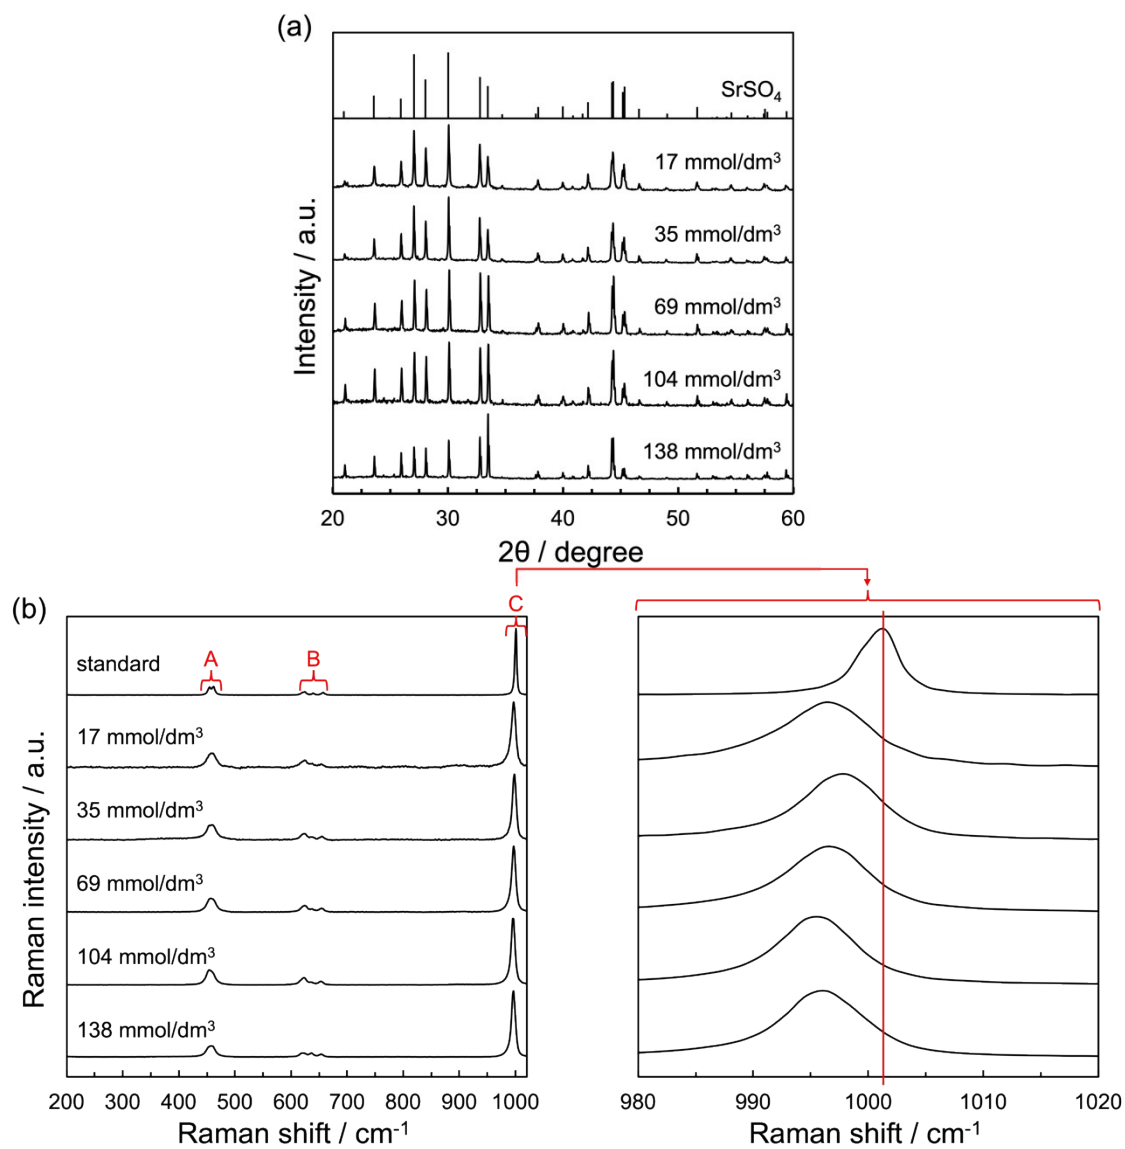

Fig. S6 XRD patterns (a) and Raman spectra (b) of products in supersaturated solution containing various concentrations of PAA. The Raman signals A, B, and C are assigned to the S-O symmetric stretching vibration, the S-O double expansion and stretching vibration, and the S-O asymmetric stretching vibration, respectively.<sup>2</sup>

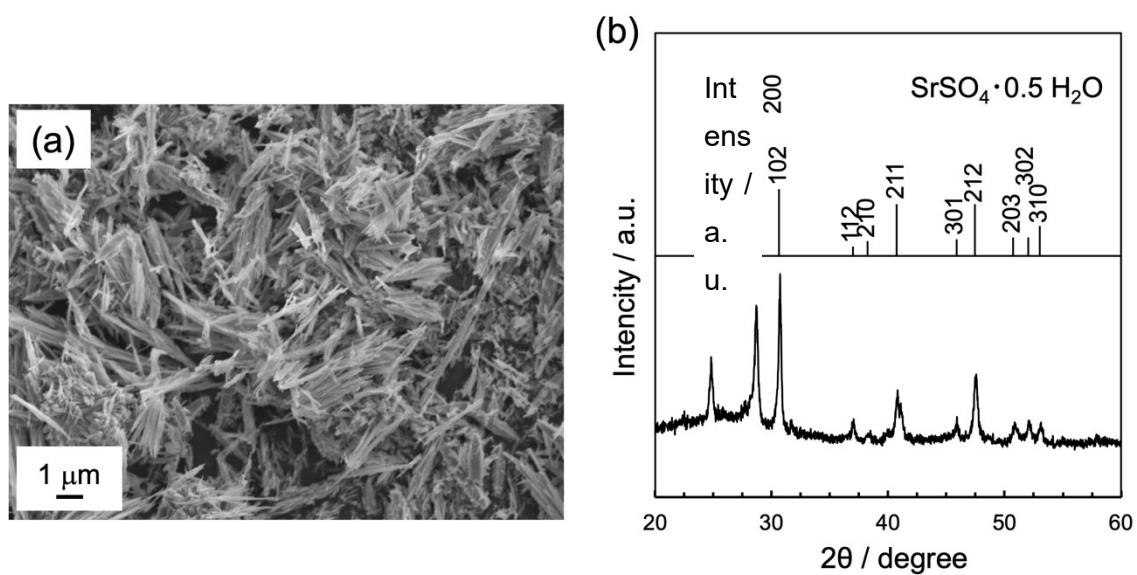

Fig. S7 SEM image (a) and XRD pattern (b) of the product in a supersaturated solution at pH 12. We adjusted the pH value by addition of NaOH aq. ( $0.1 \text{ mol/dm}^3$ ).

## References

1. N. P. Hughes, C. C. Perry, O. R. Anderson and R. J. P. Williams, *Proc. Royal Soc. B*, 1989, **238**, 223–233.
2. A. A. Kaminskii, L. Bohatý, P. Becker, H. Rhee, H. J. Eichler, O. Lux and V. V. Koltashev, *Appl. Phys. B Lasers Opt.*, 2011, **105**, 363–378.
